# Supplementary material for: Detection of Five Mycotoxins in Different Food Matrices in the Malaysian Market by Using Validated Liquid Chromatography Electrospray Ionization Triple Quadrupole Mass Spectrometry
Source: MDPI journal article supplement (doi:10.3390/toxins11040196), 2019-03-31
Supplement: s1 [file s1]

# Supplementary Materials: Detection of Five Mycotoxins in Different Food Matrices in the Malaysian Market by Using Validated Liquid Chromatography Electrospray Ionization Triple Quadrupole Mass Spectrometry

Ali Mohamed Ali Alsharif, Yeun-Mun Choo and Guan-Huat Tan

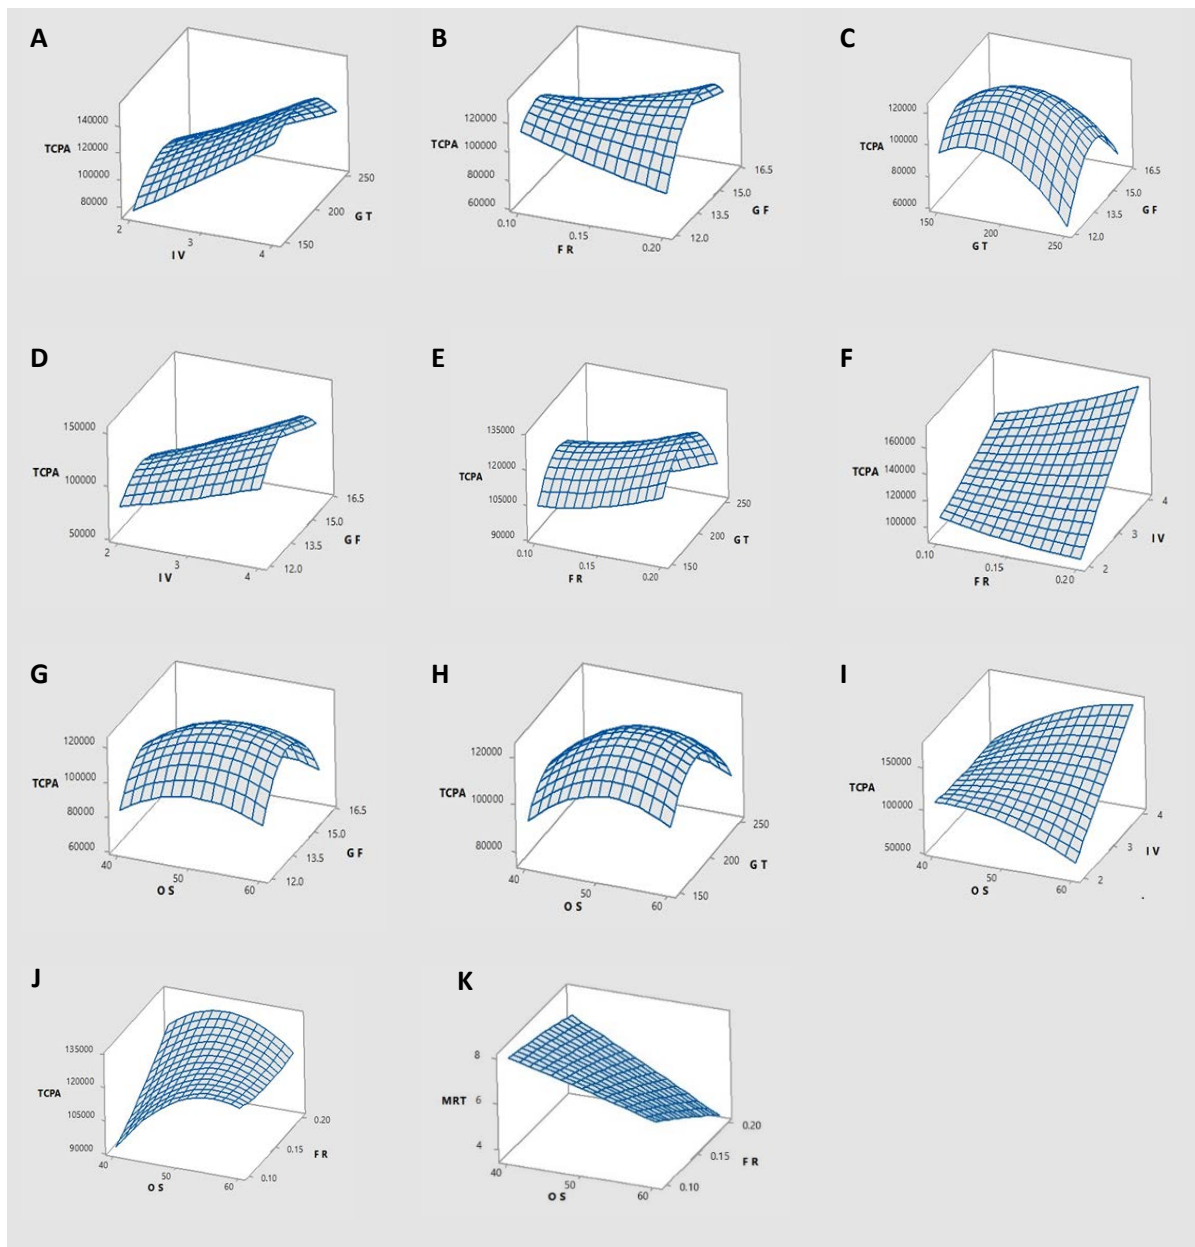

**Figure 1.** TPCA Response surface plot for (A) injection volume vs. gas temperature; (B) flow rate vs. gas flow; (C) gas temperature vs. gas flow; (D) injection volume vs. gas flow; (E) flow rate vs. gas temperature; (F) flow rate vs. injection volume; (G) organic solvent vs. gas temperature; (H) organic solvent vs. gas temperature; (I) organic solvent vs. injection volume; (J) organic solvent vs. flow rate; and MRT Response surface plot for (K) organic solvent vs. flow rate.

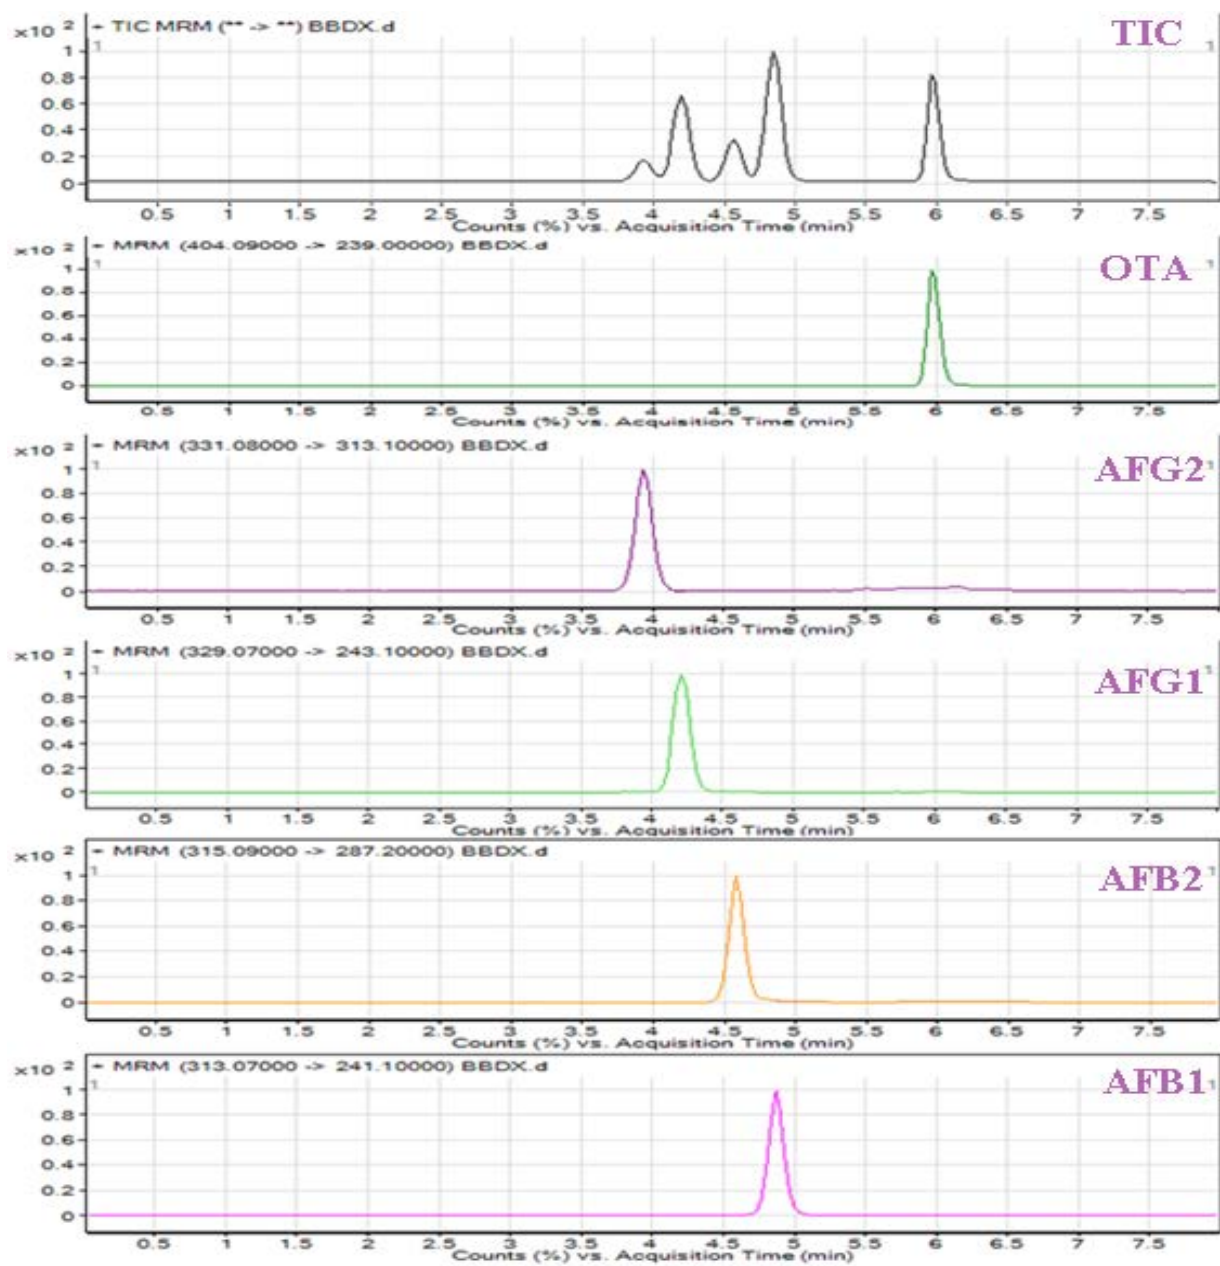

**Figure 2.** Total Ion Chromatogram (TIC) and MRM chromatogram of Mycotoxins Standard from Box-Behnken Design (BBD) Study.
